# Supplementary material
Source: PubMed Central journal article supplement (PMC5489892)
Supplement: ajtr0009-2920-f6.pdf [file ajtr0009-2920-f6.pdf]

WISP-1 is a noninvasive biomarker of renal fibrosis

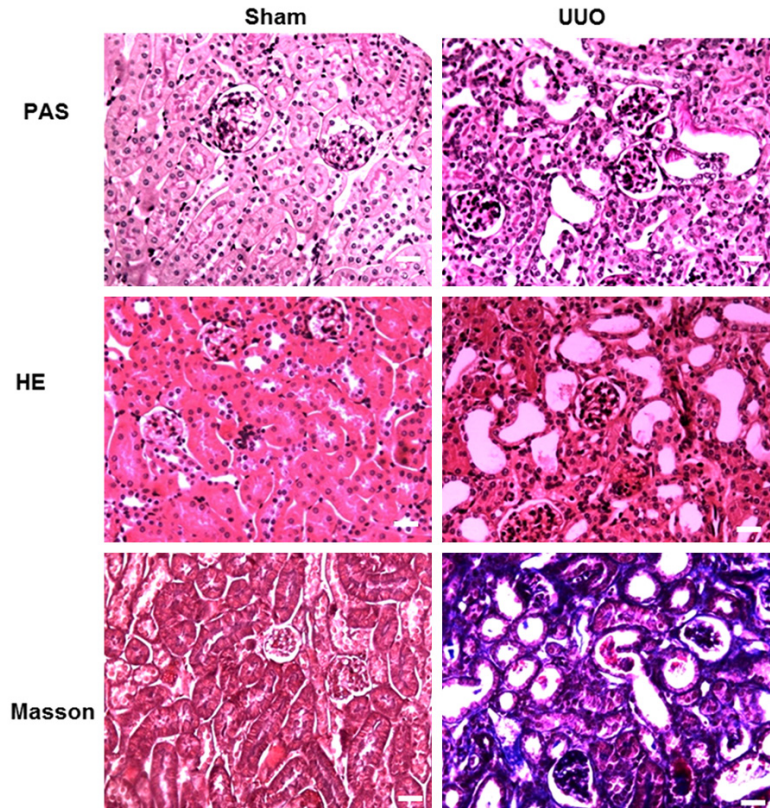

**Figure S1.** Renal fibrosis in UUO mice was measured using HE, PAS and Masson's trichrome staining. Representative images of renal morphology in the UUO and sham mice. Extracellular matrix deposition was significantly increased in the tubulointerstitium of the obstructed kidney. HE, hematoxylin and eosin; PAS, periodic acid-Schiff; UUO, unilateral ureteral obstruction. Bars =50  $\mu$ m.

## WISP-1 is a noninvasive biomarker of renal fibrosis

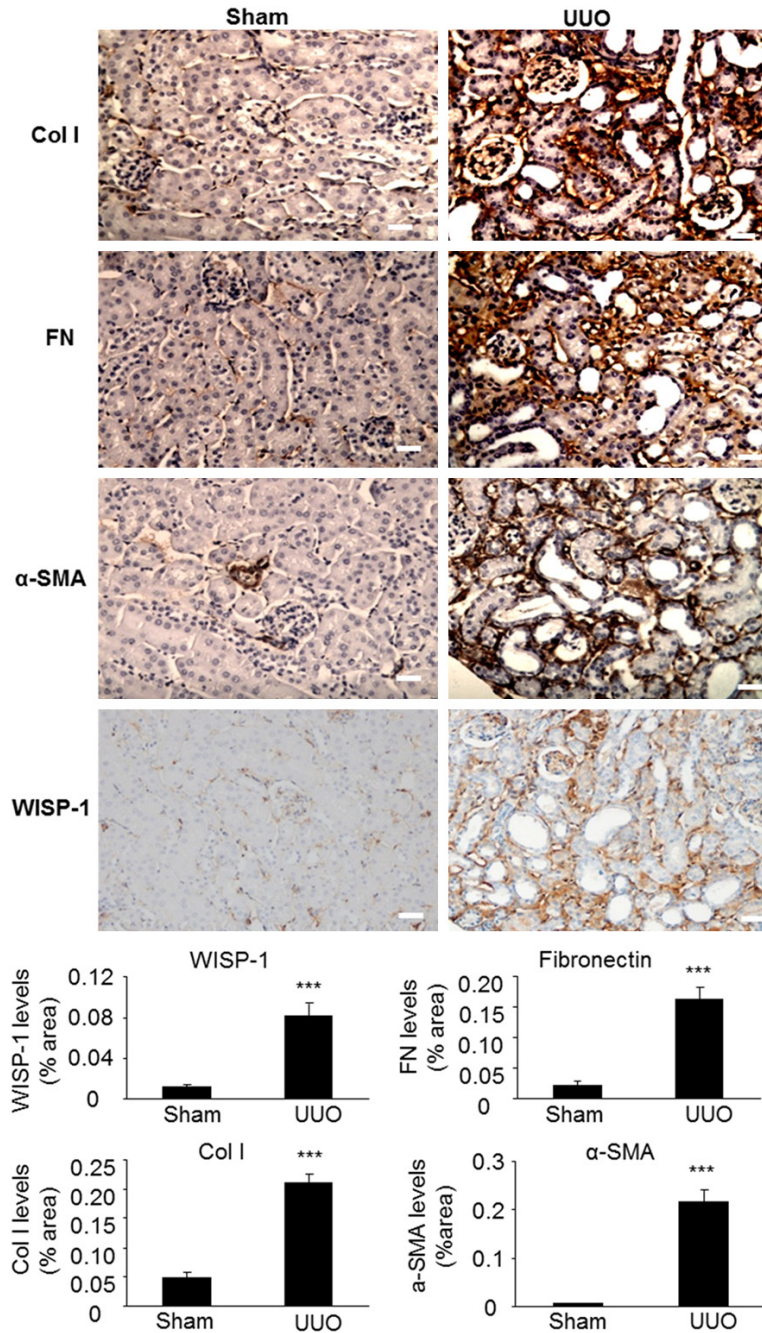

**Figure S2.** Levels of WISP-1 and fibrotic markers in the UUO mice were measured using immunohistochemistry. Representative images of immunohistochemical staining in UUO and sham mice. The WISP-1, fibronectin, collagen I and  $\alpha$ -SMA expression levels are significantly increased in the mice with obstructed kidneys compared to the sham mice.  $\alpha$ -SMA,  $\alpha$ -smooth muscle actin; Col I, collagen I; FN, fibronectin; UUO, unilateral ureteral obstruction. \*\*\* $P < 0.001$  compared with the sham mice. Bars = 50  $\mu$ m.
